# Supplementary material
Source: PubMed Central journal article supplement (PMC5553636)
Supplement: NIHMS851335-supplement-Figure_S1.pdf [file NIHMS851335-supplement-Figure_S1.pdf]

## Supplementary document

# Treatment and primary prevention in People Who Inject Drugs for Chronic Hepatitis C: Is elimination possible in a high prevalence setting?

Gountas I.<sup>1</sup>, Sypsa V.<sup>1</sup>, Anagnostou O.<sup>2</sup>, Martin N.K.<sup>3,4</sup>, Vickerman P.<sup>4</sup>, Kafetzopoulos E.<sup>2</sup>, Hatzakis A.<sup>1</sup>

<sup>1</sup>Department of Hygiene, Epidemiology & Medical Statistics, Athens University Medical School, Athens, Greece.

<sup>2</sup>Organization Against Drugs (OKANA), Athens, Greece.

<sup>3</sup>Division of Global Public Health, University of California, San Diego, USA

<sup>4</sup>School of Social and Community Medicine, University of Bristol, Bristol

**Figure S1:** Differences in model's predictions according to the modeling of harm reduction (HR) programmes in CHC prevalence (1a) or HCV incidence (1b) among PWID by 2030 under the scenario of 332 annual antiviral treatments.

### 1a. Chronic HCV Prevalence among PWID

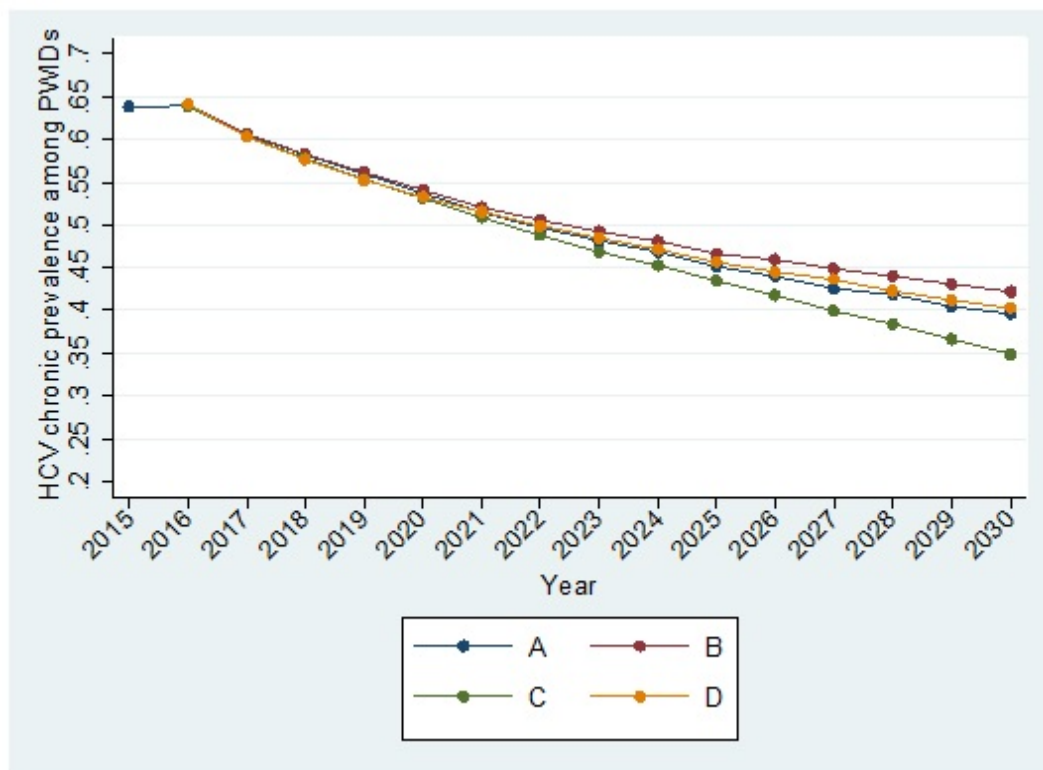

A: One year duration of HR and 2% annual increase in the HR coverage

B: One year duration of HR without increase in the HR coverage

C: Always on HR and 2% annual increase in the HR coverage

D: Always on HR without increase in the HR coverage

### 1b. New infections among PWID

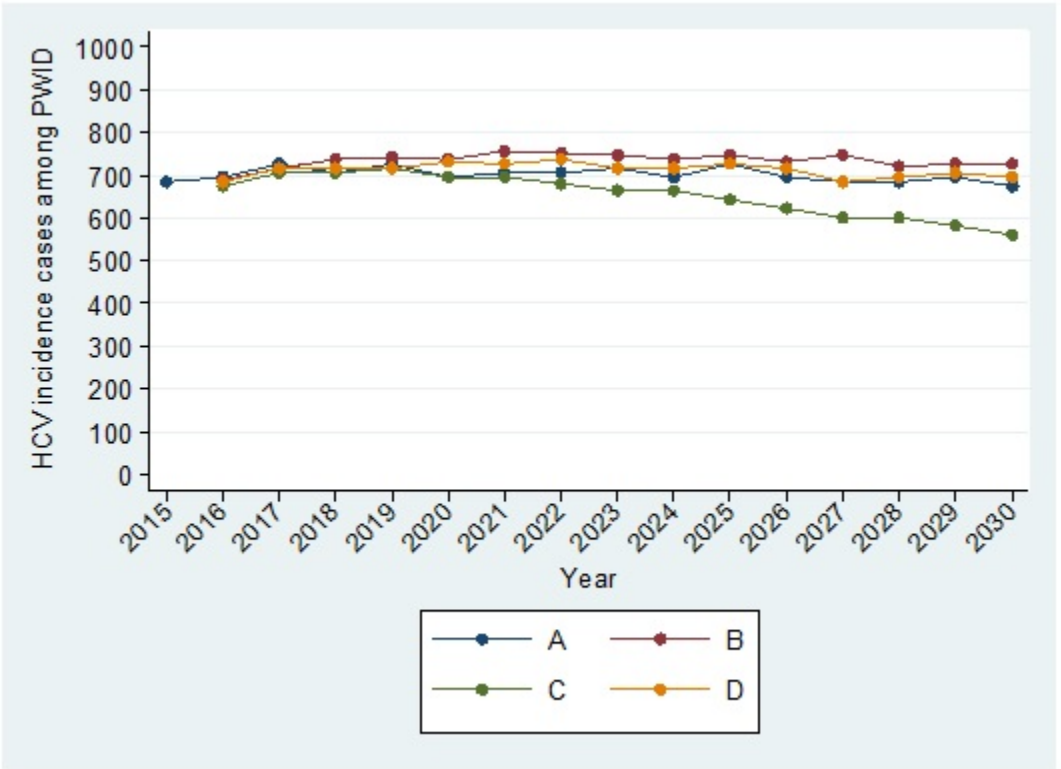

- A: One year duration of HR and 2% annual increase in the HR coverage
- B: One year duration of HR without increase in the HR coverage
- C: Always on HR and 2% annual increase in the HR coverage
- D: Always on HR without increase in the HR coverage

**Table S1:** Sensitivity Analysis table.

| <b>Parameters</b>                                                                                      | <b>Value used in the primary analysis</b>       | <b>Values examined in the sensitivity analysis</b> |
|--------------------------------------------------------------------------------------------------------|-------------------------------------------------|----------------------------------------------------|
| <b>Duration of injecting carrier among PWID in Athens</b>                                              | 12 years                                        | 6 or 18 years                                      |
| <b>Duration of harm reduction</b>                                                                      | Indefinitely if enter in Harm reduction program | 12 months                                          |
| <b>Relative risk for HCV infection for high risk PWID (<math>\pi</math>)</b>                           | 2.3                                             | 5                                                  |
| <b>Relative risk for HCV infection while in a harm reduction programme (<math>Z</math>)</b>            | 0.41                                            | 0.2 or 0.8                                         |
| <b>Duration in the high risk group (<math>12/\kappa</math>)</b>                                        | 12 months                                       | 10 years                                           |
| <b>IFN-free DAAs SVR</b>                                                                               | 90% until 2017<br>95% until 2030                | 80 or 100%                                         |
| <b>Allocation of treatments among those engaging in harm reduction programmes vs. those who do not</b> | 66%/33%                                         | (50/50%) or (80%/20%)                              |
| <b>Change of risk behavior after successful treatment</b>                                              | No change                                       | 50% lower or 50% higher                            |
